# Supplementary material for: The BAF chromatin remodeler synergizes with RNA polymerase II and transcription factors to evict nucleosomes
Source: PubMed Central journal article supplement (PMC10786724; doi:10.1038/s41588-023-01603-8), 2023-12-04

# Unprocessed blots for Extended Data Fig. 5

SOX2

BRG1

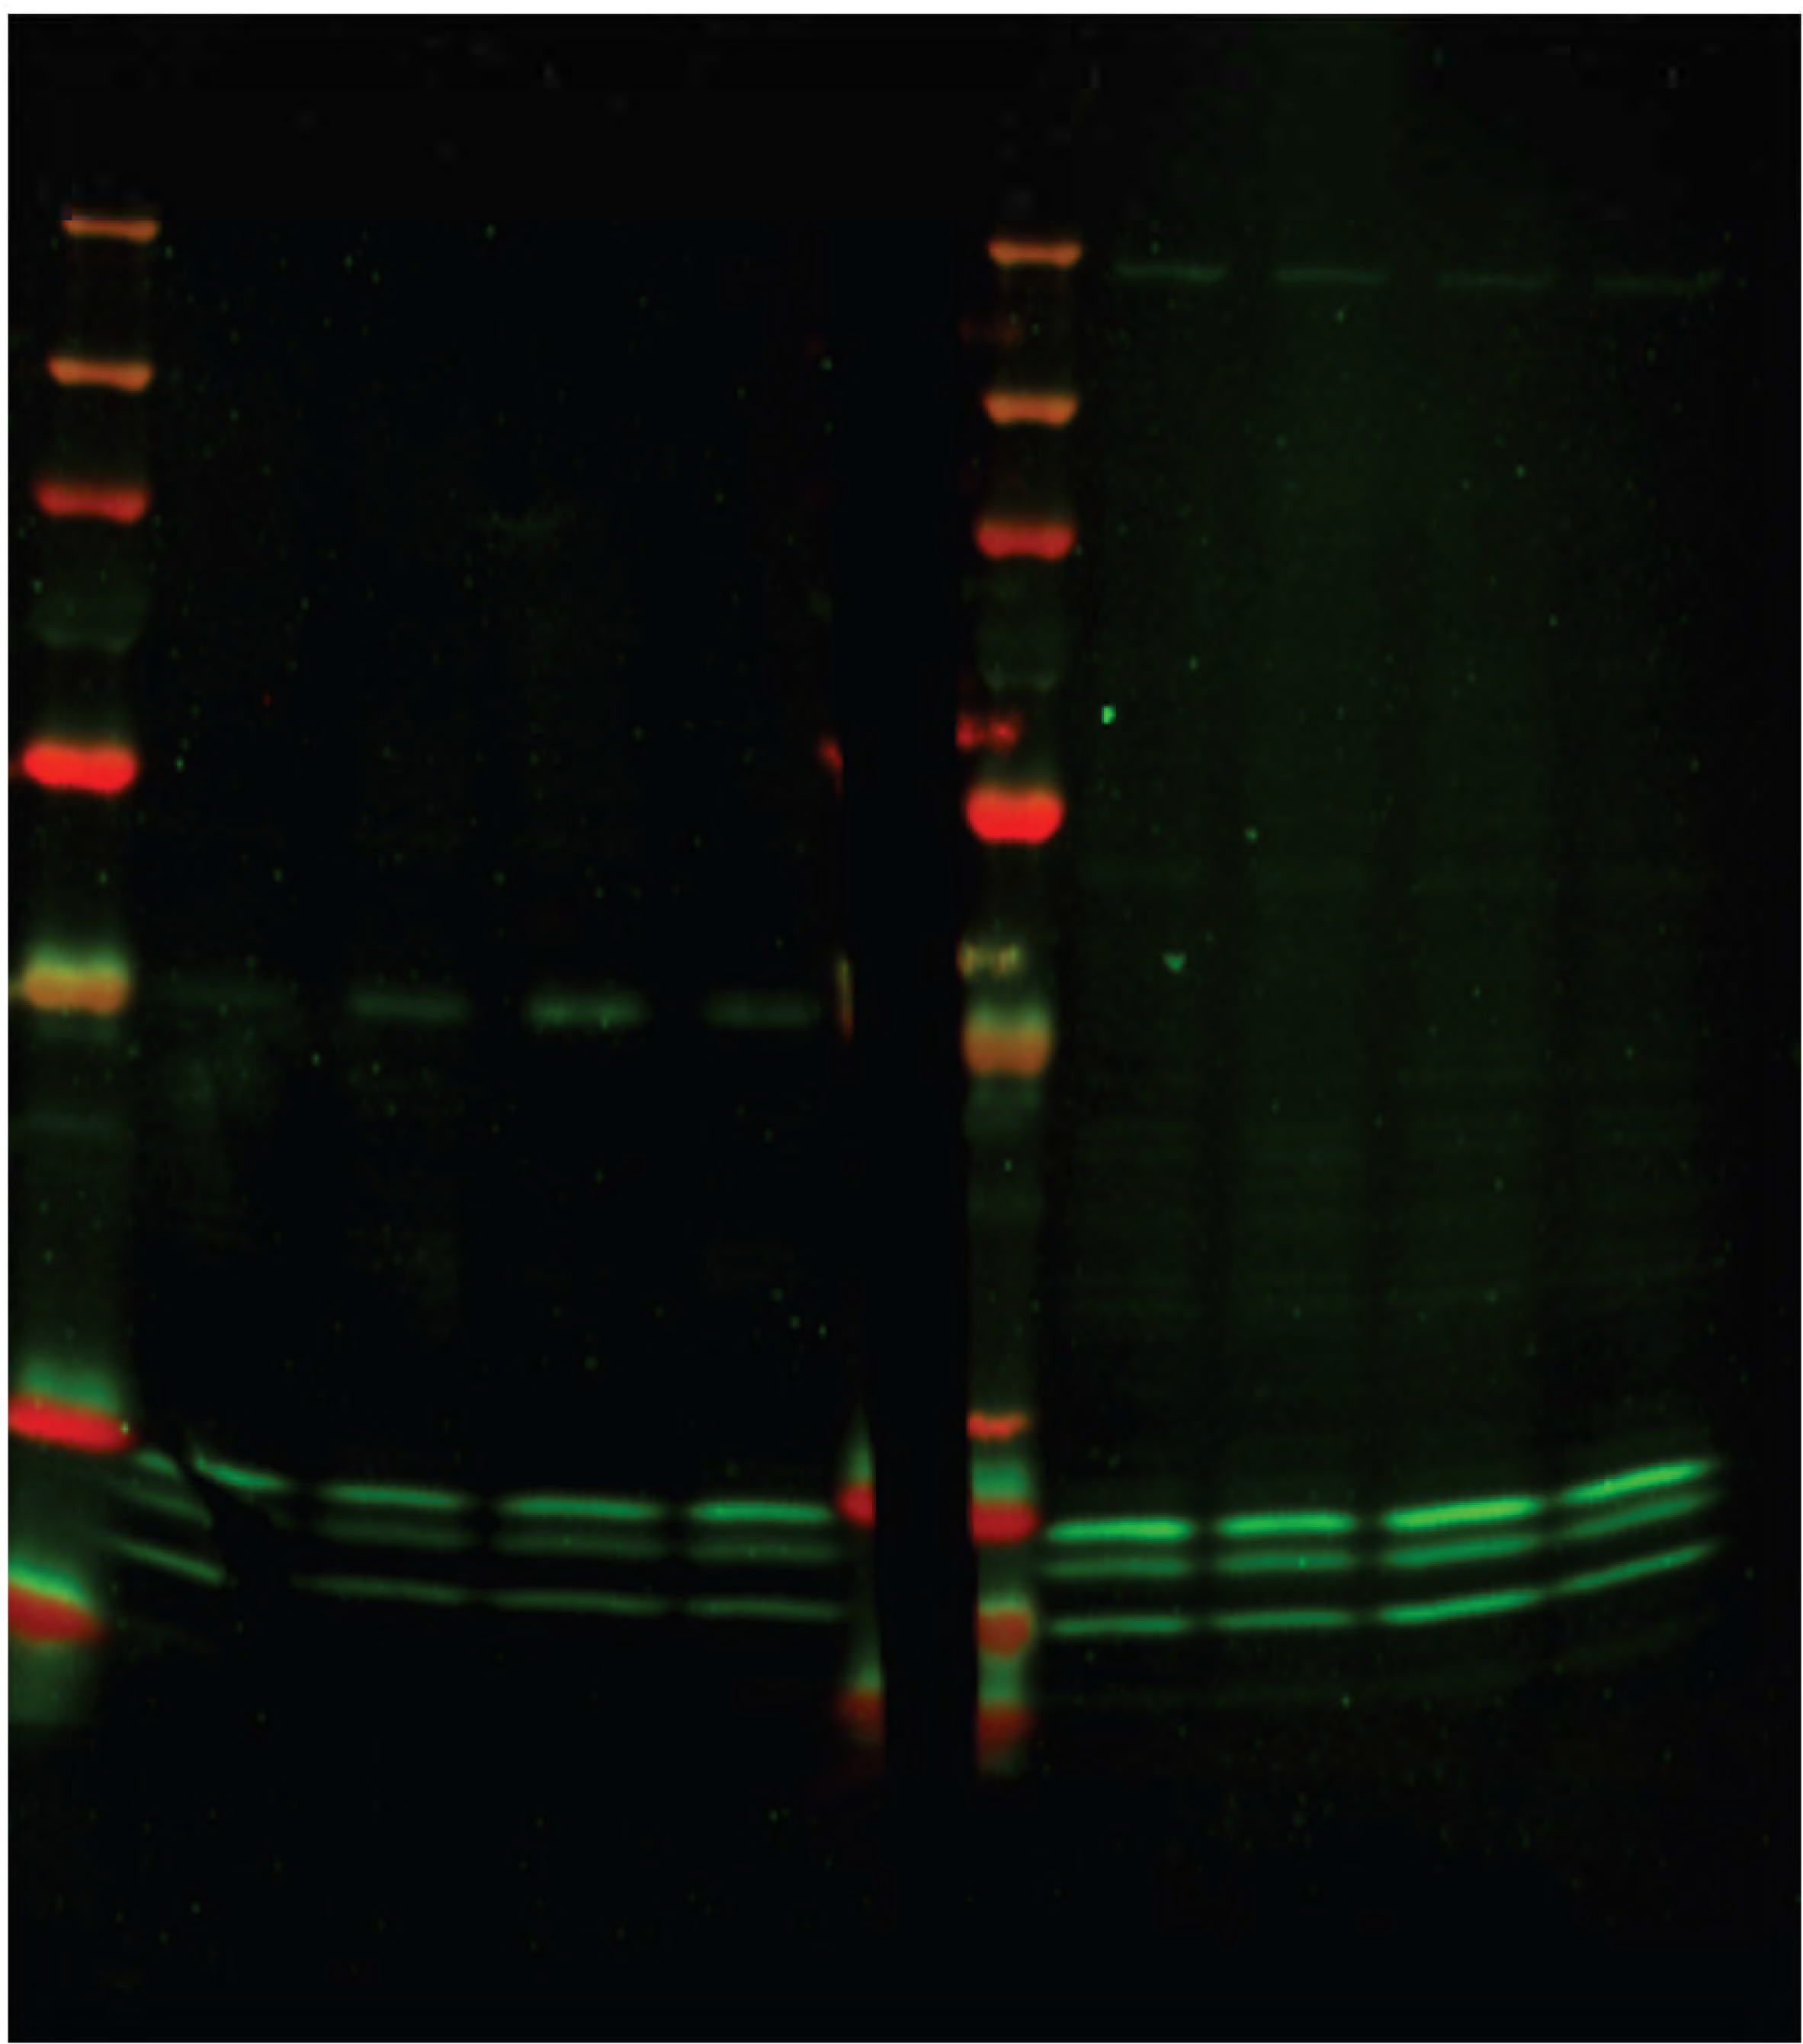

NANOG

OCT4

KLF4

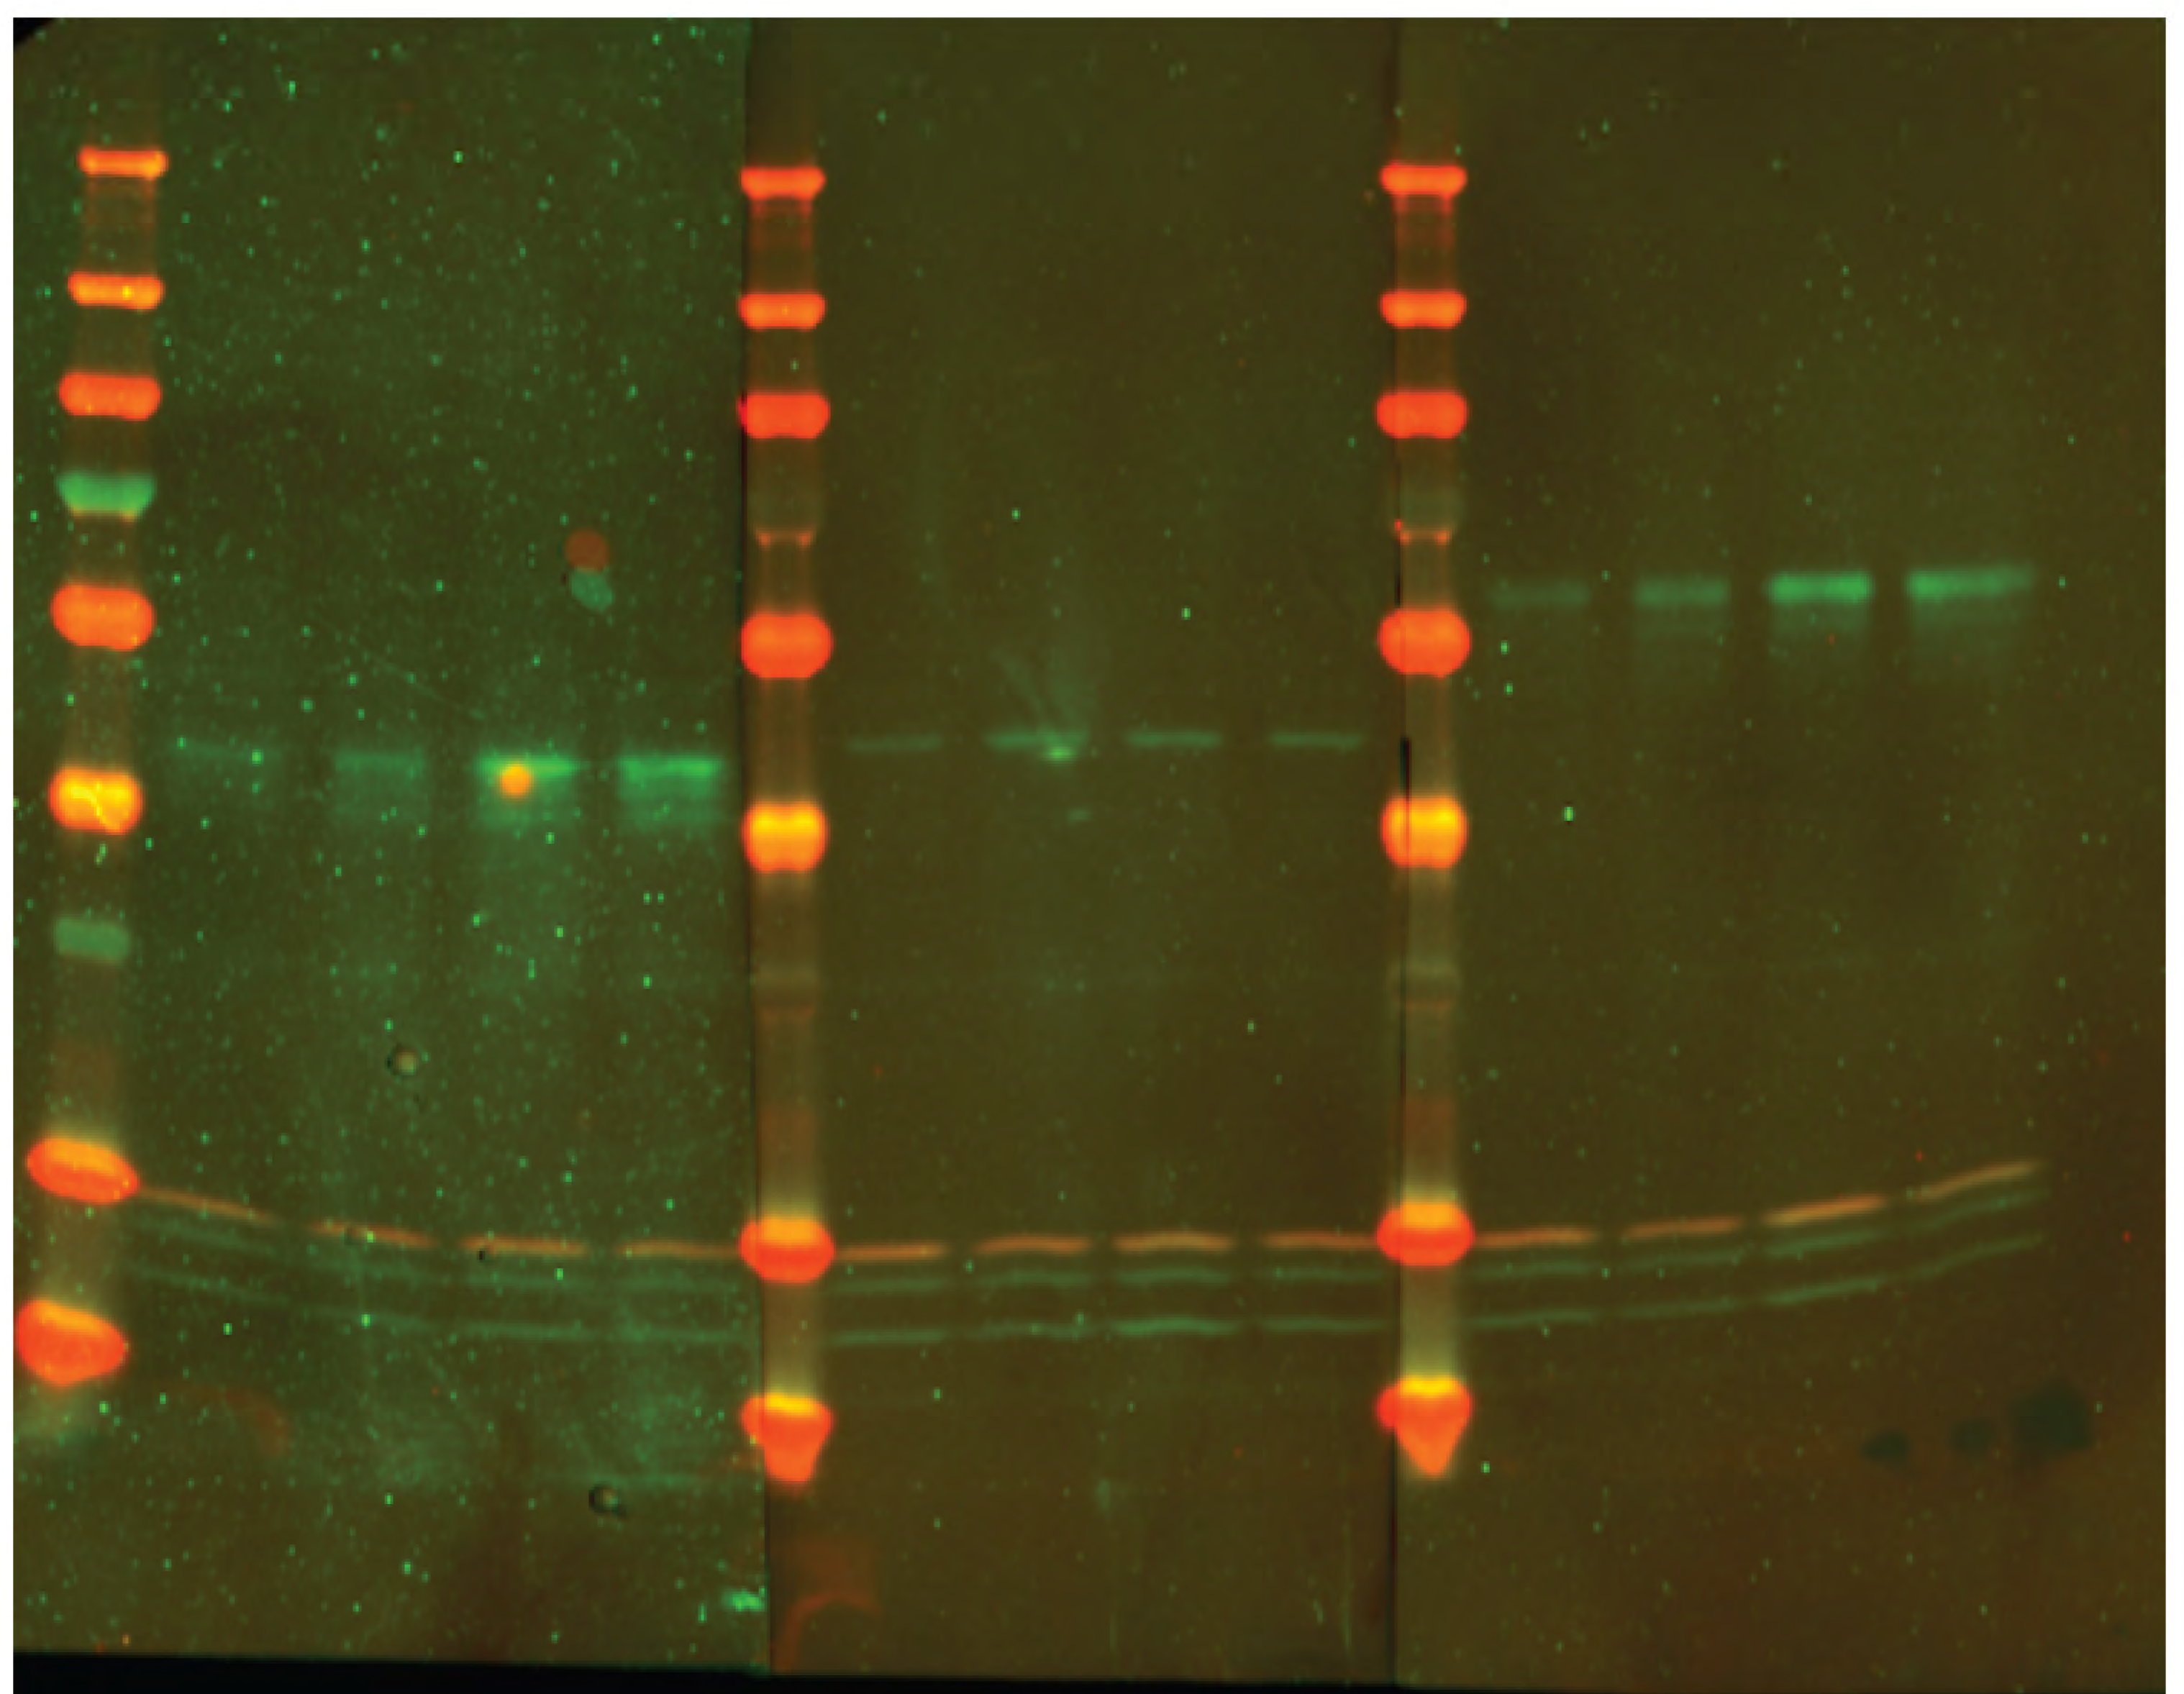

Supplement: 41588_2023_1603_MOESM4_ESM.pdf [file 41588_2023_1603_MOESM4_ESM.pdf]
